# Supplementary material for: Evaluation of Clinical and Biochemical Traits in Egyptian Barki Sheep with Different Growth Performances
Source: MDPI journal article supplement (doi:10.3390/ani13060962), 2023-03-07
Supplement: s1 [file s1]

## Supplemental information file

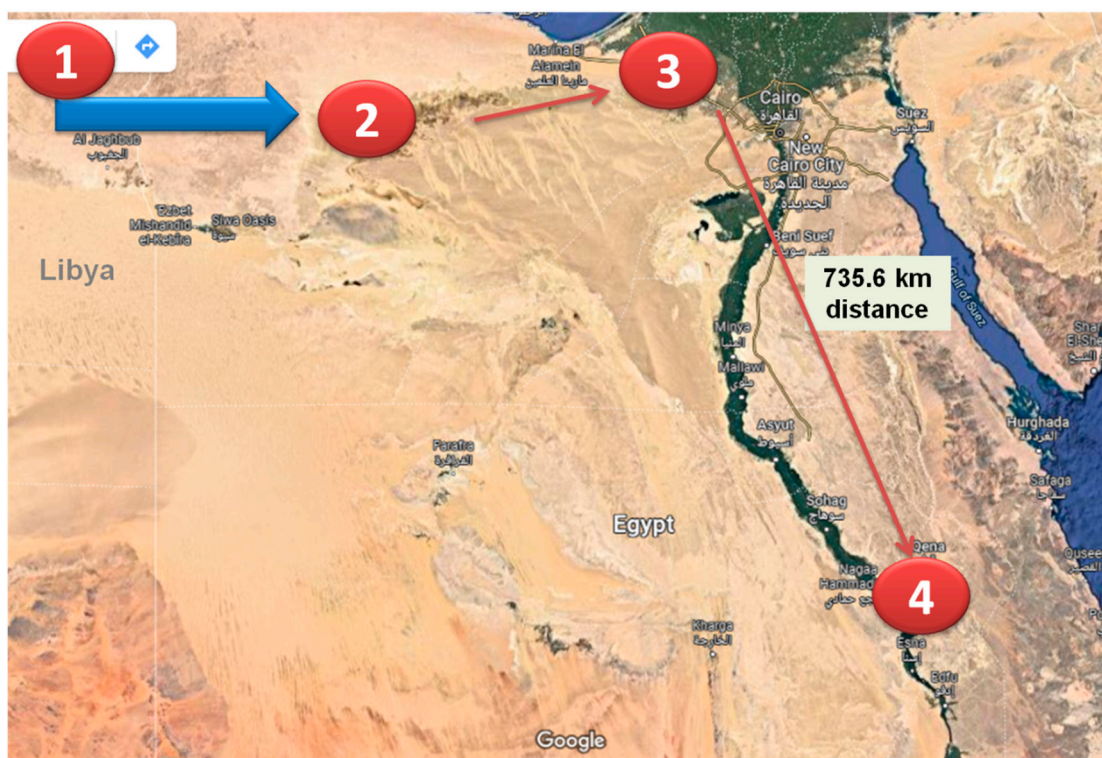

**Figure S1.** Map of Egypt showing the location and movement of Barki sheep of this study. 1; refers to Barca region in Eastern Libya (origin of Barki sheep in Egypt), 2; Matrouh governorate which is the most common place for breeding of Barki sheep in Egypt, 3; Beheira governorate which is the main collection center for Egyptian Barki sheep and the main distributing region for other Egyptian governorates, 4; Qena governorate which was the final destination for our tested Barki sheep.

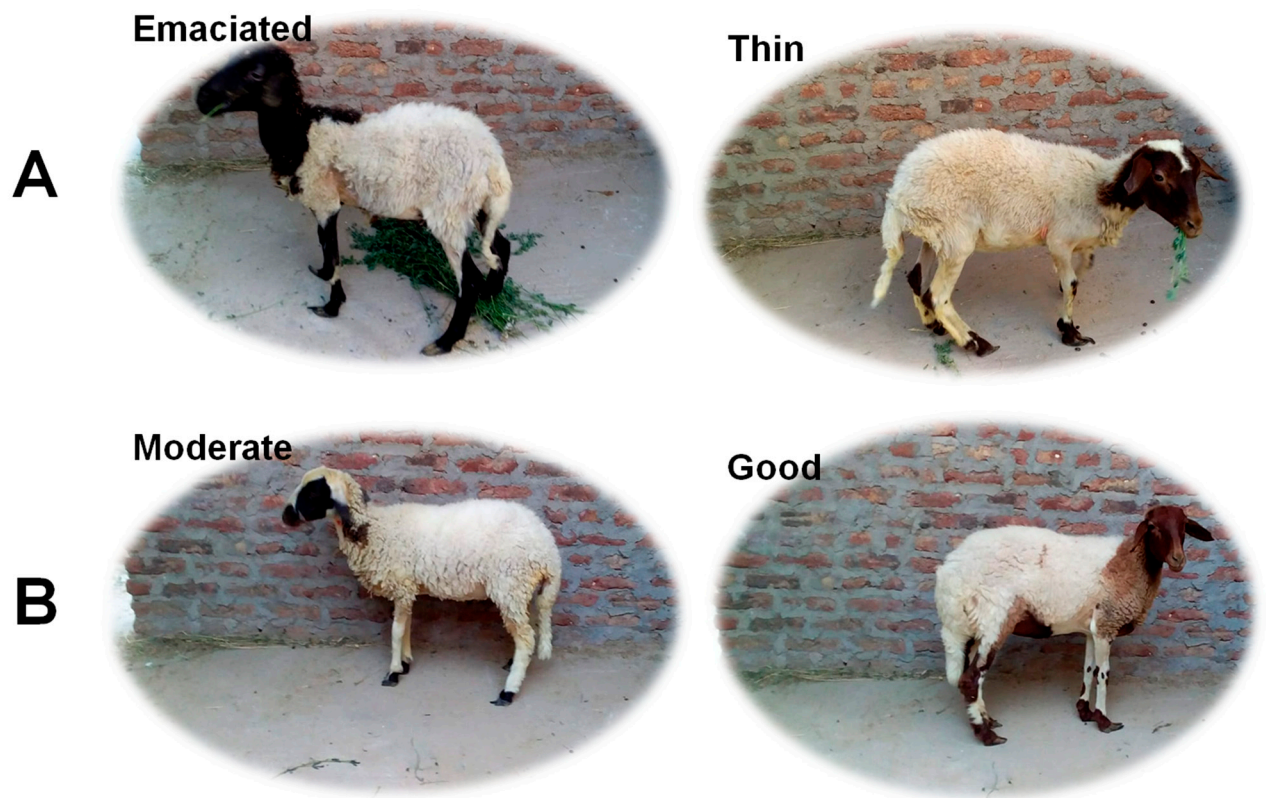

**Figure S2.** Representative image for Barki sheep used in the current study. (A) Sheep of stunted or test group that included animals with body condition score of BCS 1; emaciated and BCS 2; thin. (B) Sheep of good body condition or control group that comprised animals with body condition score of BCS 3; moderate and BCS 4; good.

**Table S1.** Biochemical variables among stunted and good body condition Barki sheep.

| Parameter (unit)            | Stunted (n = 10) | Good condition (n = 9) | <i>P- value</i> |
|-----------------------------|------------------|------------------------|-----------------|
| Cholesterol (mg/dl)         | 35.7 ±5.8        | 49.8 ±8.8              | 0.0007          |
| Triglycerides (mg/dl)       | 36 ±3.3          | 46.9 ±10.4             | 0.0059          |
| Creatinine (mg/dl)          | 0.58 ±0.09       | 0.81 ±0.1              | <0.0001         |
| Urea (mg/dl)                | 29.6 ±3.2        | 26.9 ±2.9              | 0.0381          |
| Blood urea nitrogen (mg/dl) | 13.8 ±1.5        | 12.3 ±1.4              | 0.0381          |
| Total bilirubin (mg/dl)     | 0.5 ±0.29        | 0.46 ±0.16             | 0.738           |
| Direct bilirubin (mg/dl)    | 0.15 ±0.07       | 0.13 ±0.03             | 0.473           |
| Indirect bilirubin (mg/dl)  | 0.35 ±0.3        | 0.33 ±0.15             | 0.858           |
| ALT (U/l)                   | 31.1 ±5.4        | 35.1 ±12.6             | 0.370           |
| AST(U/l)                    | 86.5 ±46.4       | 90.8 ±33               | 0.822           |
| Total protein (g/dl)        | 6.7 ±0.44        | 7.2 ±0.48              | 0.0445          |
| Albumin (g/dl)              | 3.6 ±0.27        | 4.1 ±0.4               | 0.0087          |
| Globulin (g/dl)             | 3.1 ±0.42        | 3.1 ±0.7               | 1               |
| A/G ratio (numerical)       | 1.2 ±0.2         | 1.4 ±0.4               | 0.193           |
| Glucose (mg/dl)             | 45.3 ±5.3        | 45.1 ±9.1              | 0.956           |
| Calcium (mg/dl)             | 8.7 ±0.6         | 8.3 ±2.4               | 0.700           |
| Phosphorus (mg/dl)          | 5.7 ±0.6         | 5.9 ±0.9               | 0.432           |
| Magnesium (mg/dl)           | 2.2 ±0.2         | 2.4 ±0.2               | 0.096           |
| Iron (µg/dl)                | 111.8 ±25        | 127.6 ±16.2            | 0.124           |
| Zinc (µg/dl)                | 50.3 ±25.3       | 44 ±11.2               | 0.499           |
| TSH (IU/ml)                 | 0.003 ±0.002     | 0.005 ±0.005           | 0.342           |
| Growth hormone (ng/ml)      | 0.06 ±0.03       | 0.08 ±0.04             | 0.250           |

ALT; Alanine transaminase, AST; Aspartate transaminase, TSH; Thyroid-stimulating hormone. Significant values at  $p < 0.05$  and highly significant at  $p < 0.0001$  as measured by t-test (unpaired)
